# Supplementary material
Source: PubMed Central journal article supplement (PMC4988670)
Supplement: NIHMS808374-supplement-Supplemental_Information.pdf [file NIHMS808374-supplement-Supplemental_Information.pdf]

## Supporting Information

### Rapid detection of bacteria from blood with surface enhanced Raman spectroscopy.

Anna K. Boardman<sup>‡</sup>, Winnie S. Wong<sup>†</sup>, W. Ranjith Premasiri<sup>§</sup>, Lawrence D. Ziegler<sup>§</sup>, Jean C. Lee<sup>‡</sup>, Milos Miljkovic<sup>‡</sup>, Catherine M. Klapperich<sup>†‡</sup>, Andre Sharon<sup>‡‡</sup>, Alexis F. Sauer-Budge<sup>‡‡\*</sup>.

<sup>‡</sup> Fraunhofer Center for Manufacturing Innovation, Fraunhofer USA, 15 Saint Mary's Street, Brookline, MA 02446, United States

<sup>†</sup> Department of Biomedical Engineering, Boston University, 44 Cummington Mall, Boston, MA 02215, United States

<sup>§</sup> Department of Chemistry and The Photonics Center, Boston University, 8 Saint Mary's Street, Boston, MA 02215, United States

<sup>‡</sup> Division of Infectious Diseases, Department of Medicine, Brigham and Women's Hospital and Harvard Medical School, 181 Longwood Avenue, Boston, MA 02115, United States

<sup>‡</sup> Department of Mechanical Engineering, Tufts University, 200 College Avenue, Medford, MA 02155, United States

<sup>‡</sup> Department of Mechanical Engineering, Boston University, 110 Cummington Mall, Boston, MA 02215, United States

\*Corresponding author: [asauerbudge@fraunhofer.org](mailto:asauerbudge@fraunhofer.org)

| Microorganism                               | ATCC # or Crimson Library # | Culture Medium                                                | T (°C) | CO <sub>2</sub> |
|---------------------------------------------|-----------------------------|---------------------------------------------------------------|--------|-----------------|
| <i>Acinetobacter baumannii</i> <sup>2</sup> | ATCC 19606                  | Tryptic Soy                                                   | 37     | 0%              |
| <i>Candida albicans</i> <sup>1</sup>        | ATCC 18804                  | Yeast Extract Peptone Digest                                  | 37     | 0%              |
| <i>Enterobacter cloacae</i> <sup>2</sup>    | Crimson 33-1367             | Luria-Bertani                                                 | 37     | 0%              |
| <i>Enterococcus faecalis</i> <sup>2</sup>   | ATCC 29212                  | Tryptic Soy                                                   | 37     | 0%              |
| <i>Enterococcus faecium</i> <sup>2</sup>    | Crimson 18206               | Tryptic Soy                                                   | 37     | 0%              |
| <i>Enterococcus faecium</i> <sup>2</sup>    | Crimson 27-1362             | Tryptic Soy                                                   | 37     | 0%              |
| <i>Escherichia coli</i> <sup>3</sup>        | ATCC 25922                  | Tryptic Soy                                                   | 37     | 0%              |
| <i>Haemophilus influenzae</i> <sup>1</sup>  | ATCC 49247                  | Enriched Brain Heart Infusion                                 | 35     | 5%              |
| <i>Klebsiella oxytoca</i> <sup>3</sup>      | ATCC 13182                  | Brain Heart Infusion <sup>1</sup> /Luria-Bertani <sup>2</sup> | 37     | 0%              |
| <i>Proteus mirabilis</i> <sup>2</sup>       | ATCC 29854                  | Tryptic Soy                                                   | 37     | 0%              |
| <i>Pseudomonas aeruginosa</i> <sup>3</sup>  | ATCC 27853                  | Brain Heart Infusion <sup>1</sup> /Luria-Bertani <sup>2</sup> | 37     | 0%              |
| <i>Staphylococcus aureus</i> <sup>3</sup>   | ATCC 25904                  | Tryptic Soy                                                   | 37     | 0%              |
| <i>Staphylococcus aureus</i> <sup>2</sup>   | ATCC BAA-1556               | Tryptic Soy                                                   | 37     | 0%              |

|                                                |               |             |    |    |
|------------------------------------------------|---------------|-------------|----|----|
| <i>Staphylococcus epidermidis</i> <sup>2</sup> | ATCC 35984    | Tryptic Soy | 37 | 0% |
| <i>Streptococcus agalactiae</i> <sup>2</sup>   | ATCC BAA-22   | Tryptic Soy | 37 | 0% |
| <i>Streptococcus infantarius</i> <sup>2</sup>  | Crimson 3668  | Todd Hewitt | 37 | 0% |
| <i>Streptococcus mitis/oralis</i> <sup>2</sup> | Crimson 4611  | Todd Hewitt | 37 | 0% |
| <i>Streptococcus pneumoniae</i> <sup>3</sup>   | ATCC 49619    | Todd Hewitt | 35 | 5% |
| <i>Streptococcus salivarius</i> <sup>2</sup>   | Crimson 14591 | Tryptic Soy | 37 | 0% |

**Table S1.** List of 17 different microorganisms used in the current study and their cultivation conditions. <sup>1</sup> Used solely for sample preparation experiments presented in Figure 2. <sup>2</sup> Used solely for SERS identification experiments presented in Figure 3. <sup>3</sup> Used for both SERS identification and sample preparation experiments.
